# Supplementary material for: A robust AFM-based method for locally measuring the elasticity of samples
Source: publisher site journal article supplement (doi:10.3762/bjnano.9.1), 2018-01-02
Supplement: Additional file 1 [file 2190-4286-9-1-S1.pdf]

# **Supporting Information**

for

## **A robust AFM-based method for locally measuring the elasticity of samples**

Alexandre Bubendorf<sup>\*1</sup>, Stefan Walheim<sup>2,3</sup>, Thomas Schimmel<sup>2</sup> and Ernst Meyer<sup>1</sup>

Address: <sup>1</sup>Department of Physics, University of Basel, Klingelbergstrasse 82, 4056 Basel, Switzerland and <sup>2</sup>Institute of Nanotechnology (INT) and Institute of Applied Physics (Karlsruhe Institute of Technology (KIT)), Karlsruhe, Germany and <sup>3</sup>Karlsruhe Nano Micro Facility (KNMF), Karlsruhe, Germany

Email: alexander.bubendorf@outlook.fr

\* Corresponding author

**Analytical expression for normal sample stiffness**

The following computation steps establish the analytical expression for normal sample stiffness [1]. The formula is derived from the equations stated by Hurley and Turner [2] for the numerical determination of normal sample stiffness. These equations, i.e., equations (1), (2), (3), (4), (5), (6) and (7), are based on the description of the dynamics of a clamped, ideally beam-shaped cantilever elastically coupled to a sample by its tip, published by Rabe [3] and Rabe and co-workers [4]. The model takes into account characteristics of the cantilever, such as tilt angle  $\alpha$  and dimensions, namely total length  $L$ , length from the clamped end to the tip  $L_1$ , length from the tip to the free end  $L_2$ , tip height  $h$ , but also characteristics of the sample, i.e., normal sample stiffness  $k_{sample,norm}$  and lateral sample stiffness  $k_{sample,lat}$  represented by two springs coupled to the cantilever tip, as shown in Figure S1.

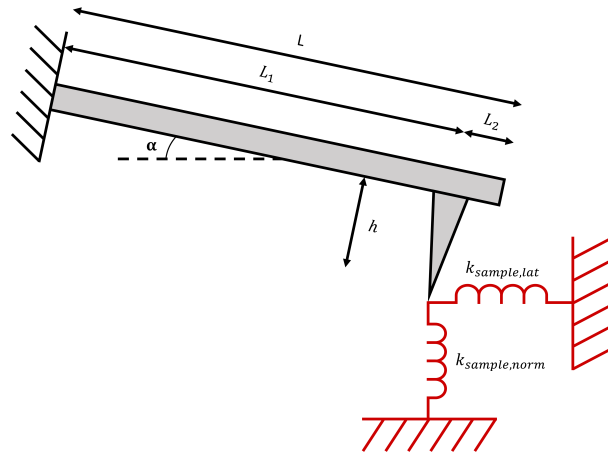

**Figure S1:** Modelization of clamped beam-shaped cantilever elastically coupled to a sample by its tip and used for the computation of normal sample stiffness. The cantilever characteristics, i.e.  $L$ ,  $L_1$ ,  $L_2$ ,  $h$  and  $\alpha$  correspond, respectively, to cantilever length, length from the clamped end to the tip, length from the tip to the free end, tip height and tilt angle. The springs  $k_{sample,norm}$  and  $k_{sample,lat}$  stand, respectively, for normal and lateral sample stiffnesses.

Wavenumbers  $x_n$  and  $y_n$  associated with the measured  $n^{\text{th}}$  flexural contact resonance  $f_n$  and torsional contact resonances  $t_n$  are computed by

$$x_n L = x_n^0 L \sqrt{\frac{f_n}{f_n^0}},$$

where  $f_n^0$  is the cantilever resonance of  $n^{th}$  flexural mode in free space and  $x_n^0$  the associated wavelength (values given in Rabe [3]) obtained from the resolution of the characteristic equation  $\cos(x_n L) \cosh(x_n L) + 1 = 0$  and

$$y_n = \frac{(2n-1)\pi t_n}{2 t_n^0},$$

where  $t_n^0$  is the cantilever resonance of  $n^{th}$  torsional mode in free space.

The normalized lateral contact stiffness is determined by

$$k_{sample,lat} = -\frac{y_n L \cos(y_n L)}{\sin(y_n L_1) \cos(y_n L_2)} k_{lat},$$

where  $k_{lat}$  is the lateral cantilever stiffness constant.

The normal contact stiffness normalized with the cantilever flexural stiffness constant  $k_1$  is obtained from the expression

$$\frac{k_{sample,norm}}{k_1} = \frac{-B \pm \sqrt{B^2 - 4AC}}{6A}, \quad (1)$$

where the positive root corresponds to the normalized contact stiffness and parameters A, B and C are defined by

$$A = \frac{k_{sample,lat}}{k_{sample,norm}} A', \quad (2)$$

where

$$A' = \left(\frac{h}{L_1}\right)^2 \left(1 - \cos(x_n L_1) \cosh(x_n L_1)\right) \left(1 + \cos(x_n L_2) \cosh(x_n L_2)\right),$$

$$B = B_1 + B_2 + B_3, \quad (3)$$

with

$$B_1 = \left[ \sin^2(\alpha) + \left( \frac{k_{sample,lat}}{k_{sample,norm}} \right) \cos^2(\alpha) \right] B'_1, \quad (4)$$

where

$$B'_1 = \left( \frac{h}{L_1} \right)^2 (x_n L_1)^3 \left[ \left( 1 + \cos(x_n L_2) \cosh(x_n L_2) \right) \left( \sin(x_n L_1) \cosh(x_n L_1) + \cos(x_n L_1) \sinh(x_n L_1) \right) - \left( 1 - \cos(x_n L_1) \cosh(x_n L_1) \right) \left( \sin(x_n L_2) \cosh(x_n L_2) + \cos(x_n L_2) \sinh(x_n L_2) \right) \right],$$

$$B_2 = \left[ \left( \frac{k_{sample,lat}}{k_{sample,norm}} - 1 \right) \cos(\alpha) \sin(\alpha) \right] B'_2, \quad (5)$$

where

$$B'_2 = 2 \left( \frac{h}{L_1} \right) (x_n L_1)^2 \left[ \left( 1 + \cos(x_n L_2) \cosh(x_n L_2) \right) \sin(x_n L_1) \sinh(x_n L_1) + \left( 1 - \cos(x_n L_1) \cosh(x_n L_1) \right) \sin(x_n L_2) \sinh(x_n L_2) \right],$$

Factor 2, that does not appear in Hurley and Turner [2], is actually a necessary correction, as introduced by Steiner et al. [5],

$$B_3 = \left[ \cos^2(\alpha) + \left( \frac{k_{sample,lat}}{k_{sample,norm}} \right) \sin^2(\alpha) \right] B'_3, \quad (6)$$

where

$$B'_3 = x_n L_1 \left[ \left( 1 + \cos(x_n L_2) \cosh(x_n L_2) \right) \left( \sin(x_n L_1) \cosh(x_n L_1) - \cos(x_n L_1) \sinh(x_n L_1) \right) \right. \\ \left. - \left( 1 - \cos(x_n L_1) \cosh(x_n L_1) \right) \left( \sin(x_n L_2) \cosh(x_n L_2) - \cos(x_n L_2) \sinh(x_n L_2) \right) \right],$$

and

$$C = 2(x_n L_1)^4 (1 + \cos(x_n L) \cosh(x_n L)). \quad (7)$$

Parameter B can be split into two terms, one with  $k_{sample,norm}$  and the other without;

$$B = \beta_1 + \beta_2 \frac{k_{sample,lat}}{k_{sample,norm}},$$

with

$$\beta_1 = \sin^2(\alpha) B'_1 - \cos(\alpha) \sin(\alpha) B'_2 + \cos^2(\alpha) B'_3,$$

and

$$\beta_2 = \cos^2(\alpha) B'_1 + \cos(\alpha) \sin(\alpha) B'_2 + \sin^2(\alpha) B'_3.$$

By setting a new variable  $\varepsilon$  of expression

$$\varepsilon = 6A' \frac{k_{sample,lat}}{k_1},$$

we can rewrite equation (1) as

$$\varepsilon + B = \pm \sqrt{B^2 - 4AC}.$$

Finally, by squaring each side of the equation and isolating  $k_{sample,norm}$ , we find the following expression for the normal sample stiffness

$$k_{sample,norm} = -\frac{2A' C \varepsilon^{-1} + \beta_2}{0.5\varepsilon + \beta_1} k_{sample,lat}.$$

## References

1. Bubendorf, A. Elasticity of Polymers Investigated by Atomic Force Microscopy. Ph. D. Thesis, University of Basel, Basel, Switzerland, 2015.
2. Hurley, D. C.; Turner, J. A. *J. Appl. Phys.* **2007**, *102*, 033509. doi:10.1063/1.2767387.
3. Rabe, U. Atomic Force Acoustic Microscopy. In *Applied Scanning Probe Methods II*; Bhusan, B., Fuchs, H., Eds.; Springer: Berlin, Heidelberg, Germany, 2006; pp 37–90. doi: 10.1007/3-540-27453-7\_2.
4. Rabe, U.; Turner, J. A.; Arnold, W. *Appl. Phys. A* **1998**, *66*, 277–282. doi:10.1007/s003390051145.
5. Steiner, P.; Roth, R.; Gnecco, E.; Glatzel, T.; Baratoff, A.; Meyer, E. *Nanotechnology* **2009**, *20*, 495701. doi:10.1088/0957-4484/20/49/495701.
